# Supplementary material
Source: PubMed Central journal article supplement (PMC7335350)
Supplement: NIHMS1592757-supplement-1.pdf [file NIHMS1592757-supplement-1.pdf]

## Supplementary Figure S1

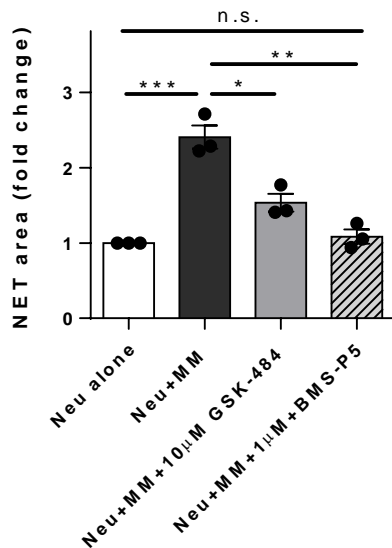

**Supplementary Figure S1. Pharmacological inhibition of PAD4 prevents MM1.S cell-induced NETosis.** Neutrophils isolated from peripheral blood of 3 different healthy donors were cultured for 4h in the presence of absence of human MM1.S MM cells with or without addition of indicated PAD4 inhibitors. NET formation was evaluated by fluorescent microscopy and quantitated. Individual results, mean and SD are shown. \*-  $p < 0.05$ ; \*\* -  $p < 0.01$ ; \*\*\* -  $p < 0.001$  in Student's *t* test.
